# Supplementary material for: Evaluation of analytical performance of homocysteine LC-MS/MS assay and design of internal quality control strategy
Source: publisher site journal article supplement (doi:10.1515/cclm-2022-0805), 2023-01-13
Supplement: Supplementary file 1 [file j_cclm-2022-0805_suppl.docx]

**Supplementary** **Table 1 Results of one-way** ANOVA **for homogeneity test of Met and Cys IQC samples.**

| [Analyte](https://dict.youdao.com/w/analyte/#keyfrom=E2Ctranslation) | QC | Source | df | SS | MS | F value | p-Value |
| --- | --- | --- | --- | --- | --- | --- | --- |
| Met | QC 1 | Intrasample | 9 | 22.681 | 2.520 | 1.649 | 0.223 |
| Intersample | 10 | 15.282 | 1.528 |
| QC 2 | Intrasample | 9 | 91.113 | 10.124 | 2.104 | 0.131 |
| Intersample | 10 | 48.117 | 4.812 |
| Cys | QC 1 | Intrasample | 9 | 16682.983 | 1853.665 | 2.040 | 0.141 |
| Intersample | 10 | 9086.286 | 908.629 |
| QC 2 | Intrasample | 9 | 13239.229 | 1471.025 | 0.792 | 0.632 |
| Intersample | 10 | 18572.580 | 1857.258 |

**Abbreviations:** df*,* degrees of freedom; SS, sum of squares; MS, mean squares.

**IQC samples Lot no. is 20211201.**

**Supplementary Table 2 Results of stability test on storage conditions of Met and Cys IQC samples.**

| [Analyte](https://dict.youdao.com/w/analyte/#keyfrom=E2Ctranslation) | Temp. | Time (h) | QC 1 | | QC 2 | |
| --- | --- | --- | --- | --- | --- | --- |
| Mean ± SD | p-Value | Mean ± SD | p-Value |
| Met | Room Temp. | 0 | 24.88 ± 0.62 | - | 39.50 ± 3.33 | - |
| 4 | 25.29 ± 1.55 | 0.446 | 41.20 ± 1.06 | 0.142 |
| 24 | 26.24 ± 0.72 | 0.000*** | 41.76 ± 2.44 | 0.101 |
| 4 ℃ | 0 | 25.46 ± 1.91 | - | 39.60 ± 2.08 | - |
| 24 | 26.03 ± 1.84 | 0.505 | 40.90 ± 1.50 | 0.127 |
| 48 | 24.87 ± 1.10 | 0.404 | 39.49 ± 1.16 | 0.892 |
| Cys | Room Temp. | 0 | 262.07 ± 38.71 | - | 362.34 ± 35.01 | - |
| 4 | 277.63 ± 35.48 | 0.361 | 375.10 ± 48.45 | 0.508 |
| 24 | 257.26 ± 34.35 | 0.772 | 373.51 ± 44.26 | 0.539 |
| 4 ℃ | 0 | 242.54 ± 33.96 | - | 372.35 ± 47.47 | - |
| 24 | 264.77 ± 43.92 | 0.222 | 366.97 ± 29.51 | 0.765 |
| 48 | 245.30 ± 28.48 | 0.846 | 370.16 ± 36.84 | 0.910 |

Unit: μmol/L; ***: p-Value <0.001; **IQC samples Lot no. is 20211201.**

**Supplementary Table 3 Summarize the number of days and samples of internal quality control every month**

| Year | Month | IQC Lot no. | IQC (days) | QC 1 (n) | QC 2 (n) |
| --- | --- | --- | --- | --- | --- |
| 2021 | Oct. | 20210319 | 17 | 156 | 156 |
| 2021 | Nov. | 20210319 | 22 | 153 | 153 |
| 2021 | Dec. | 20210319 | 23 | 145 | 145 |
| 2022 | Jan. | 20210319 | 8 | 65 | 65 |
| 2022 | Jan. | 20211201 | 11 | 64 | 64 |
| 2022 | Feb. | 20211201 | 16 | 134 | 134 |
| 2022 | Mar. | 20211201 | 19 | 133 | 133 |
| Total | | | 116 | 850 | 850 |

**Supplementary Table 4 CV% changes during the 12 months after IQC in the laboratory.**

| Month | Hcy | | Cys | | Met | |
| --- | --- | --- | --- | --- | --- | --- |
| CVQC 1% | CVQC 2% | CVQC 1% | CVQC 2% | CVQC 1% | CVQC 2% |
| First | 6.42 | 7.23 | 6.10 | 6.23 | 4.64 | 4.83 |
| Second | 6.95 | 5.77 | 5.53 | 6.21 | 4.39 | 4.13 |
| Third | 6.46 | 6.56 | 4.98 | 5.05 | 4.39 | 3.84 |
| Fourth | 5.44 | 5.80 | 4.54 | 4.69 | 4.51 | 4.45 |
| Fifth | 5.25 | 4.92 | 4.46 | 3.92 | 4.76 | 5.07 |
| Sixth | 5.90 | 4.85 | 4.81 | 4.65 | 5.84 | 5.04 |
| Seventh | 5.05 | 5.54 | 4.43 | 4.65 | 5.12 | 4.99 |
| Eighth | 3.60 | 3.68 | 3.59 | 3.35 | 3.74 | 3.67 |
| Ninth | 4.38 | 3.90 | 4.53 | 4.45 | 6.37 | 6.36 |
| Tenth | 3.70 | 3.58 | 4.06 | 3.78 | 6.49 | 6.02 |
| Eleventh | 3.53 | 3.72 | 3.98 | 4.24 | 5.37 | 5.57 |
| Twelfth | 3.27 | 2.78 | 3.46 | 2.69 | 3.99 | 4.18 |


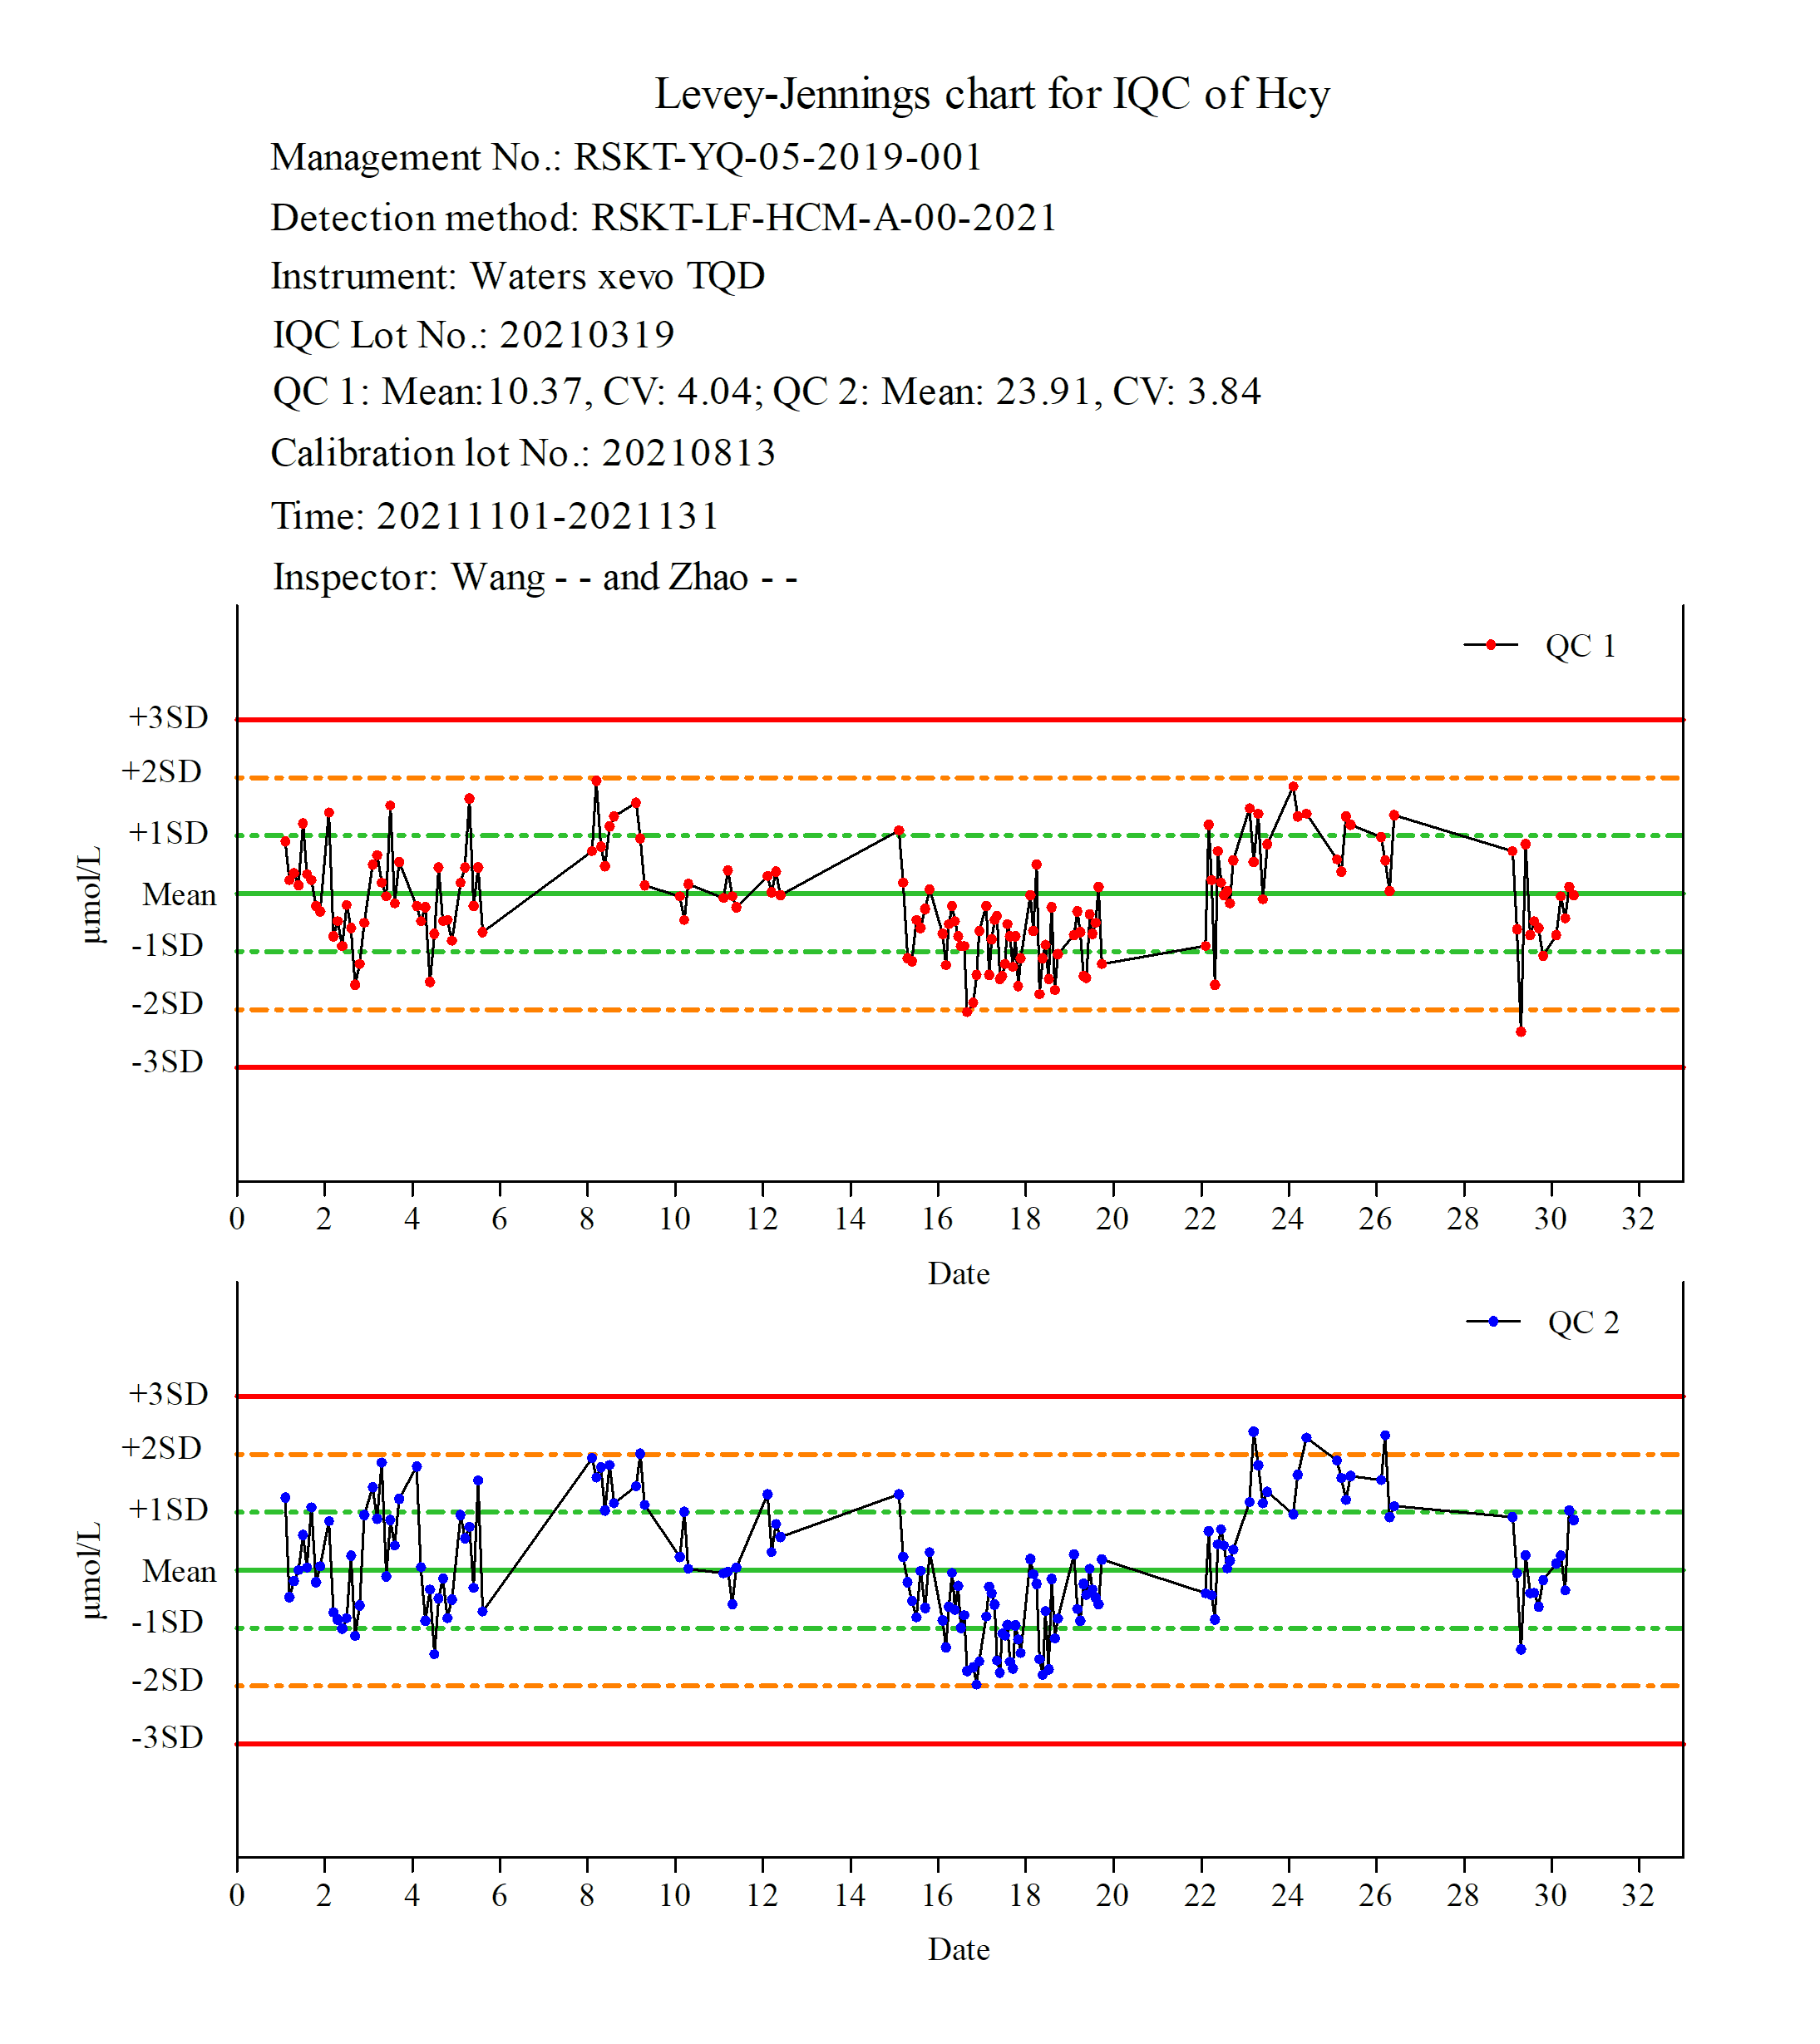
Supplementary **Figure 1** Levey-Jennings chart for Nov. IQC of Hcy (Lot no. 20210319)


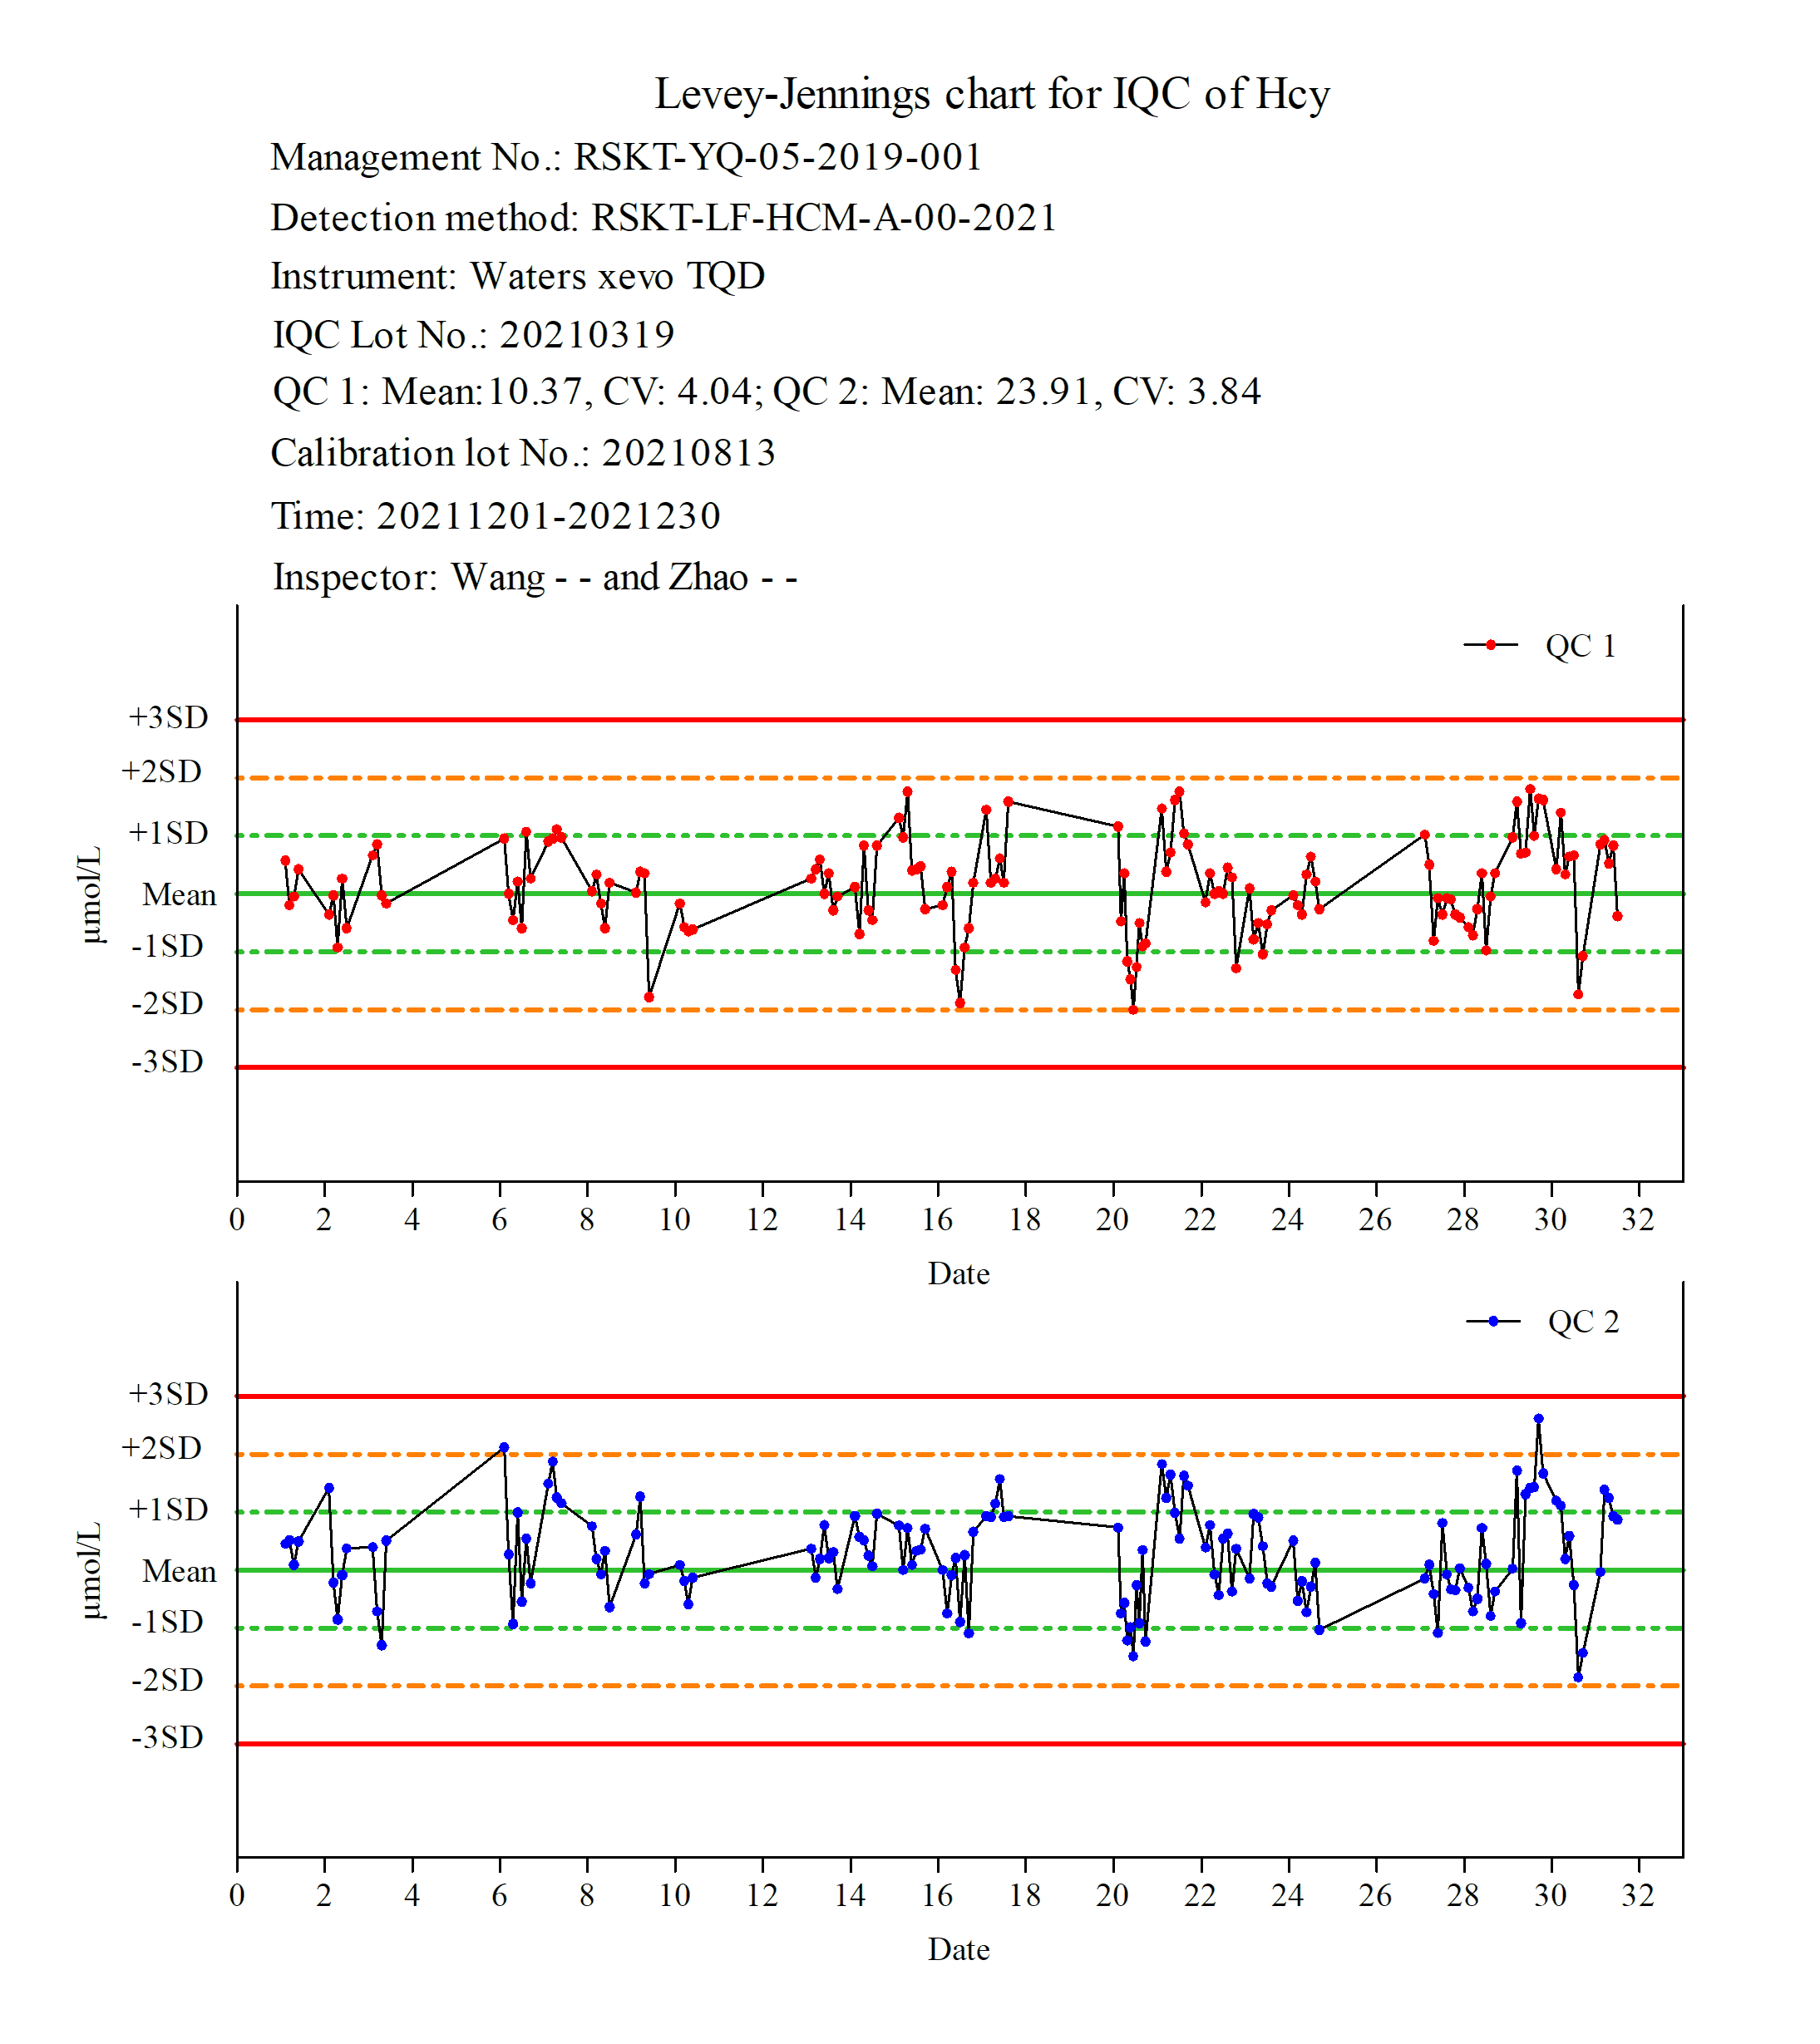
Supplementary **Figure 2** Levey-Jennings chart for Dec. IQC of Hcy (Lot no. 20210319)

**
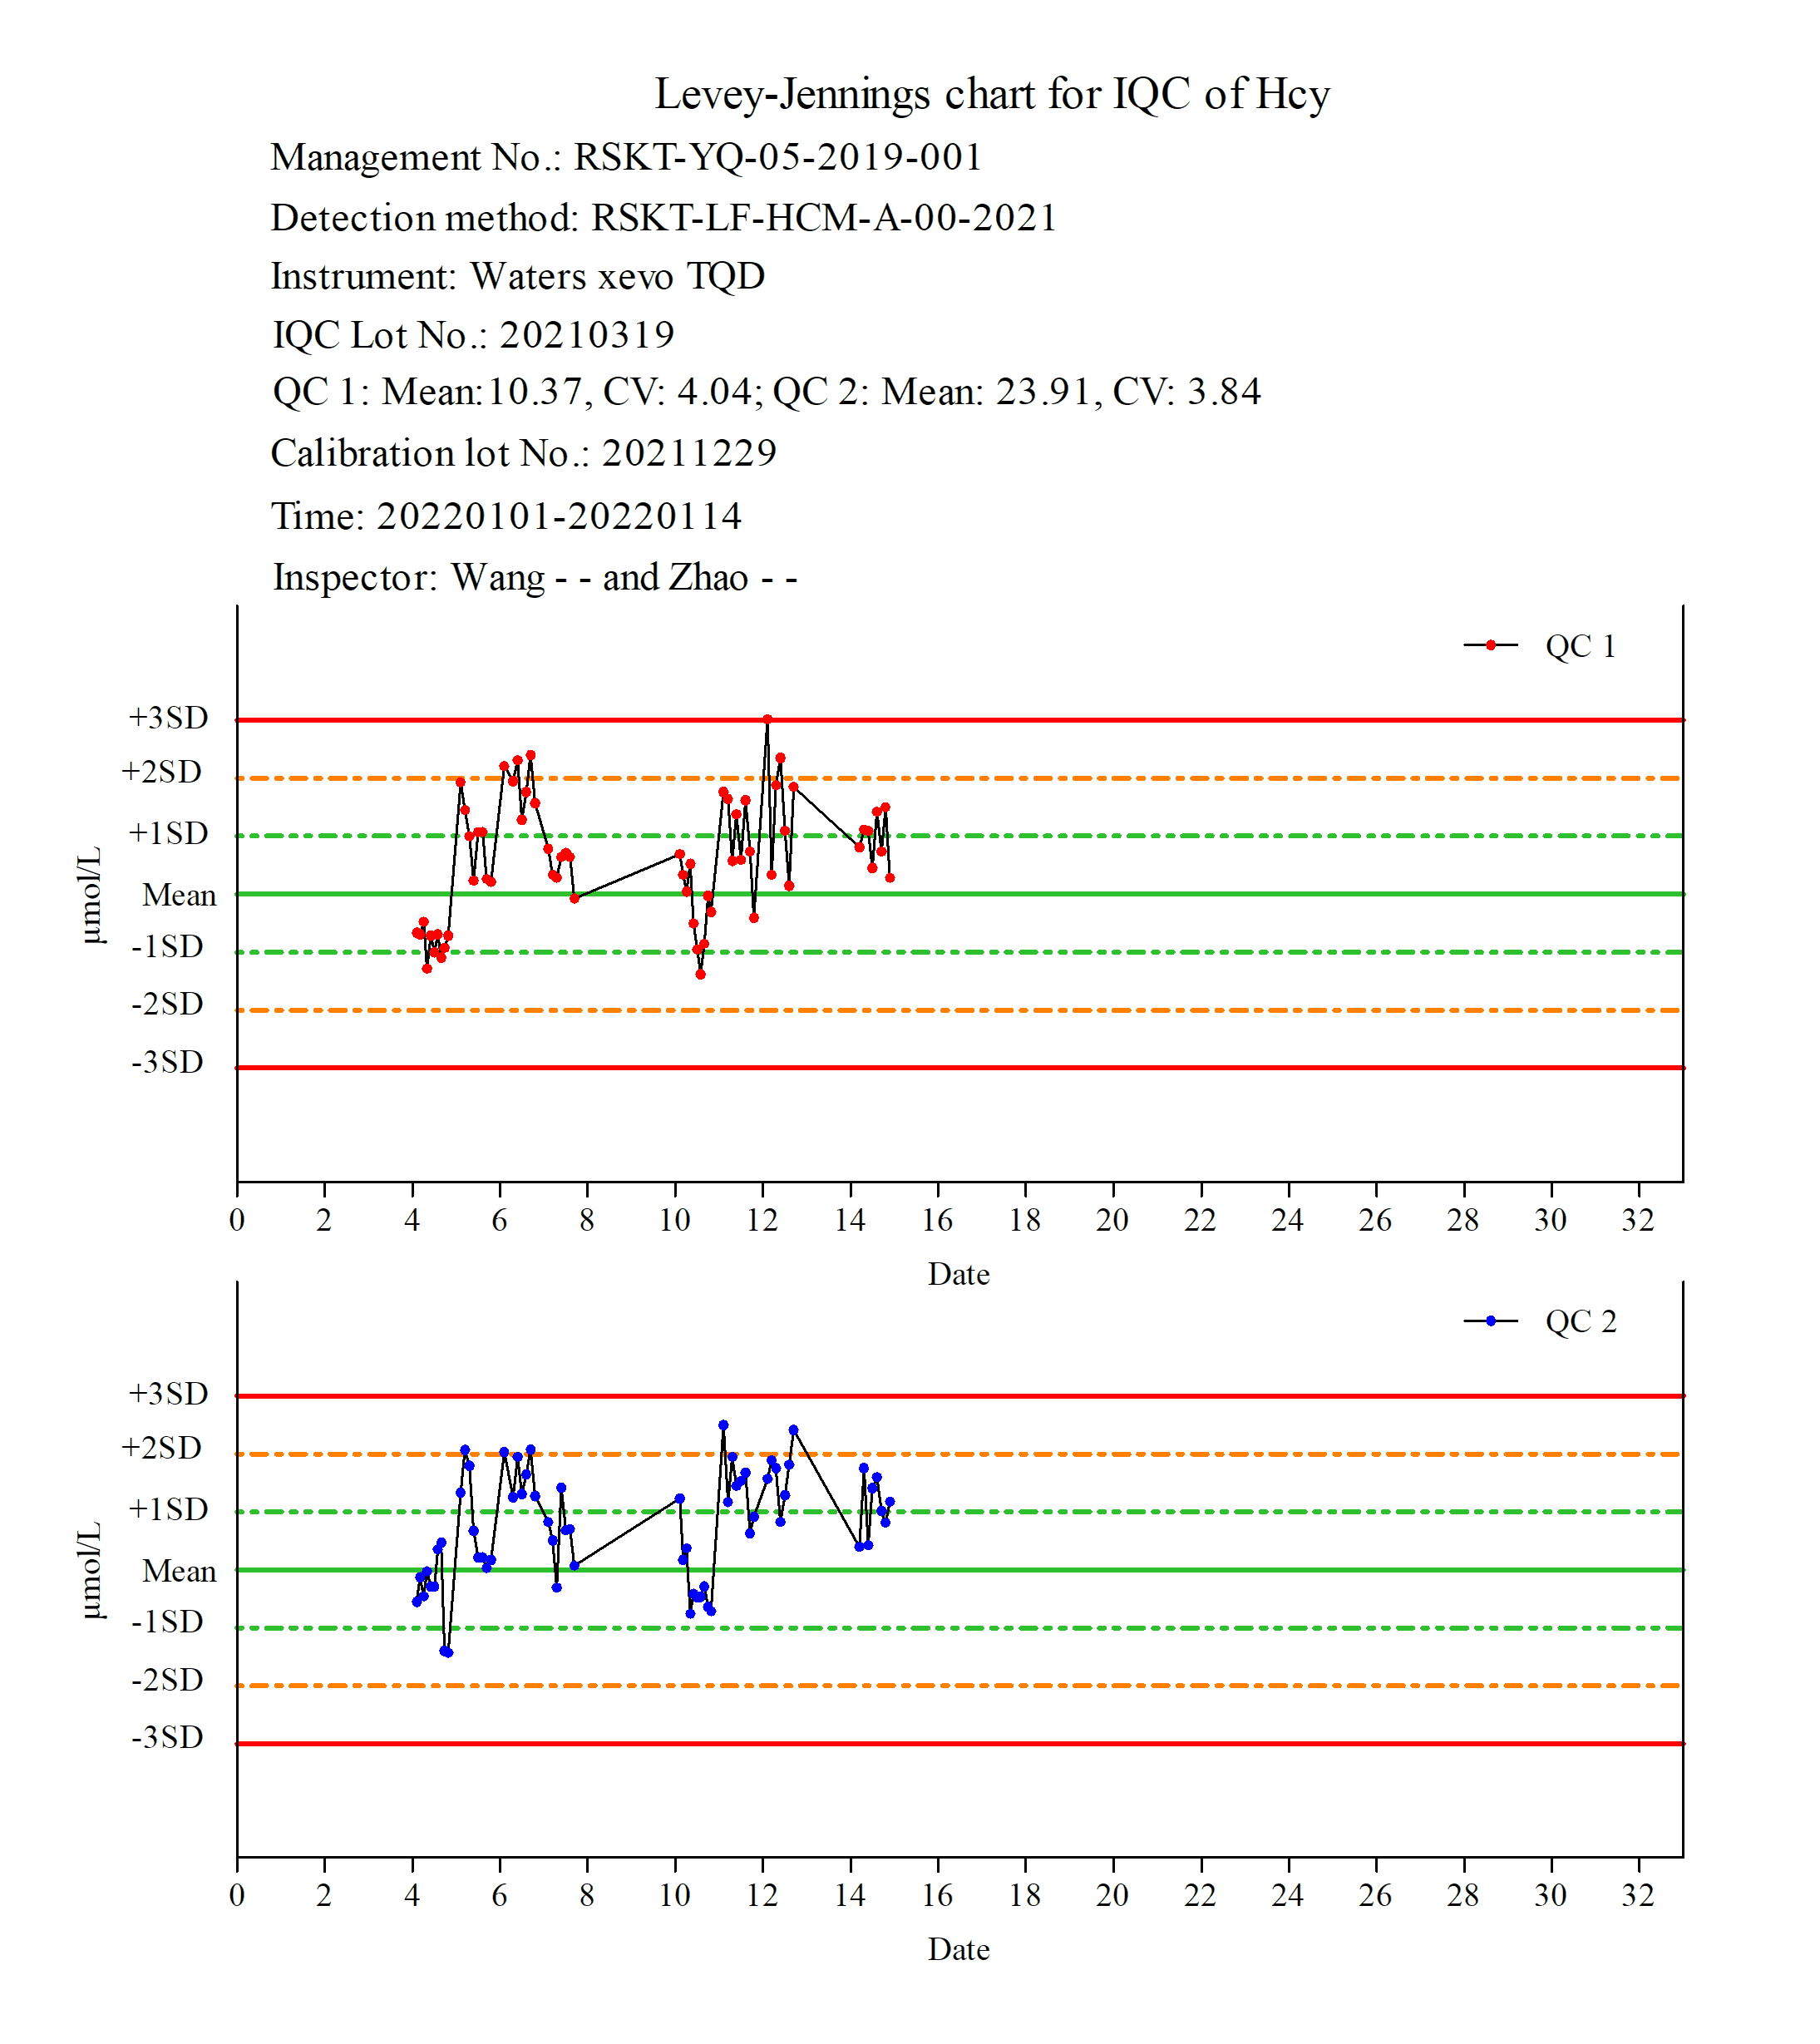
Supplementary Figure 3 Levey-Jennings chart for Jan. IQC of Hcy (Lot no. 20210319)**

**
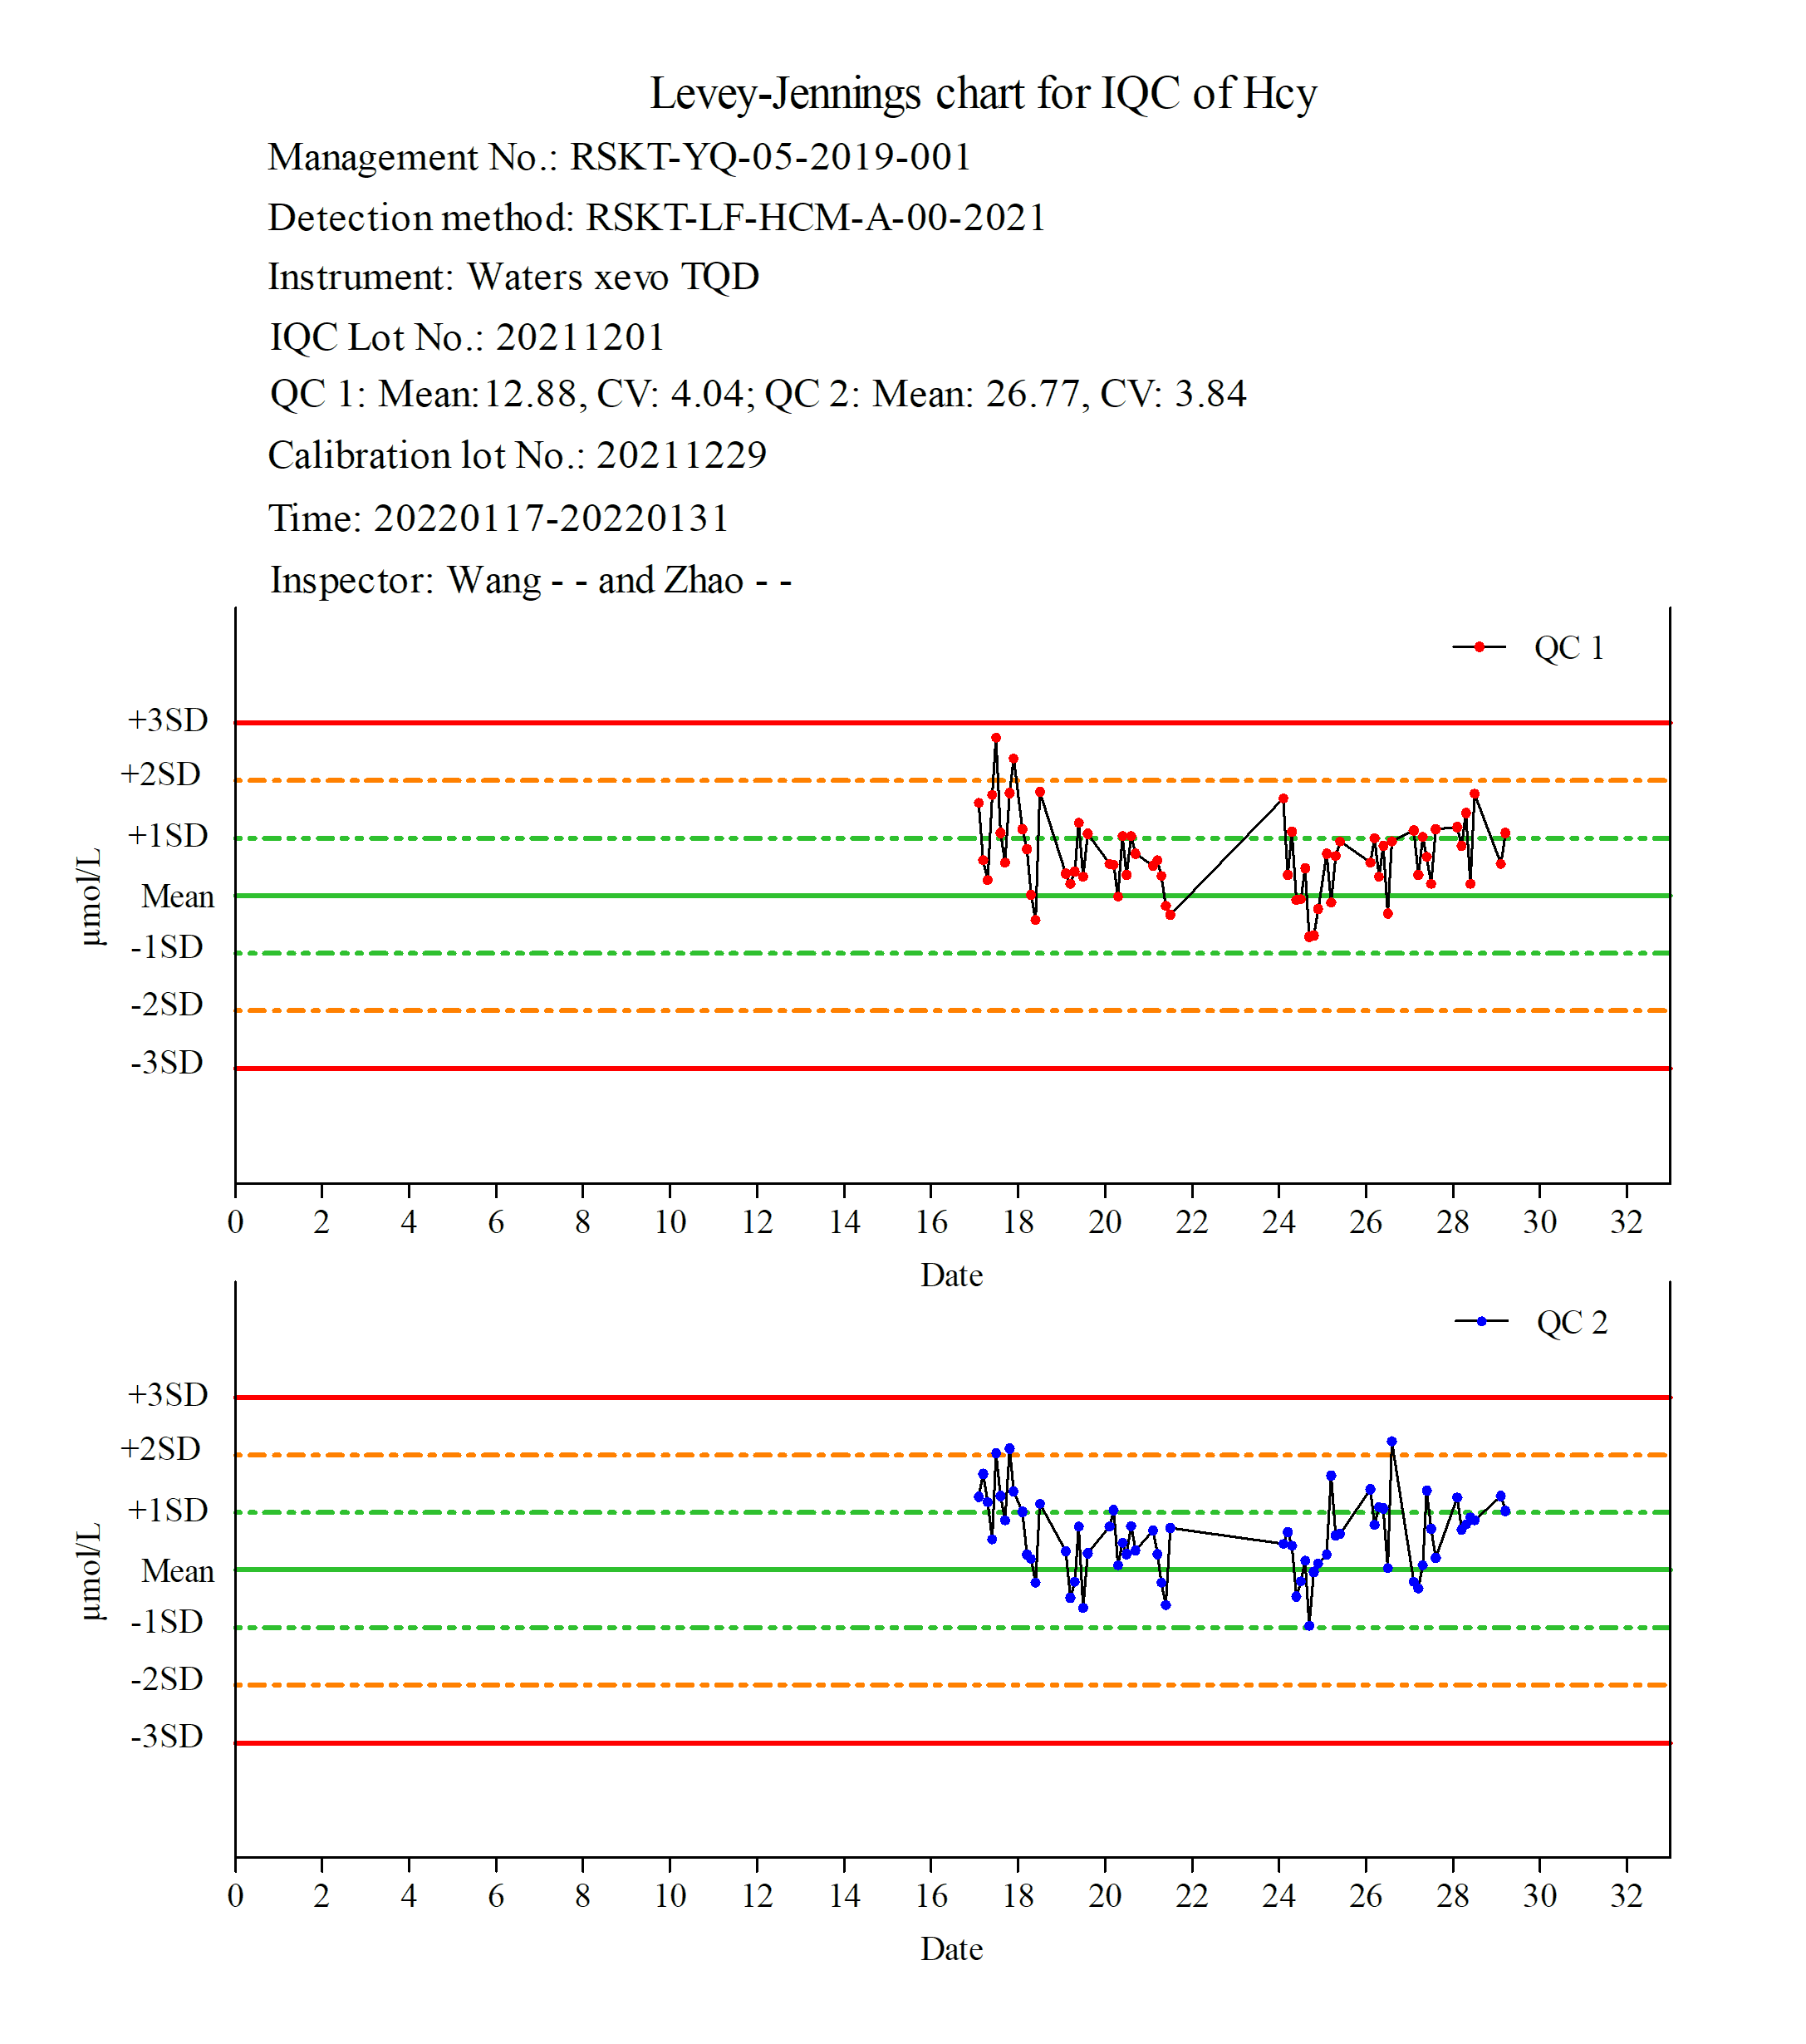
Supplementary Figure 4 Levey-Jennings chart for Jan. IQC of Hcy (Lot no. 20211201)**

**
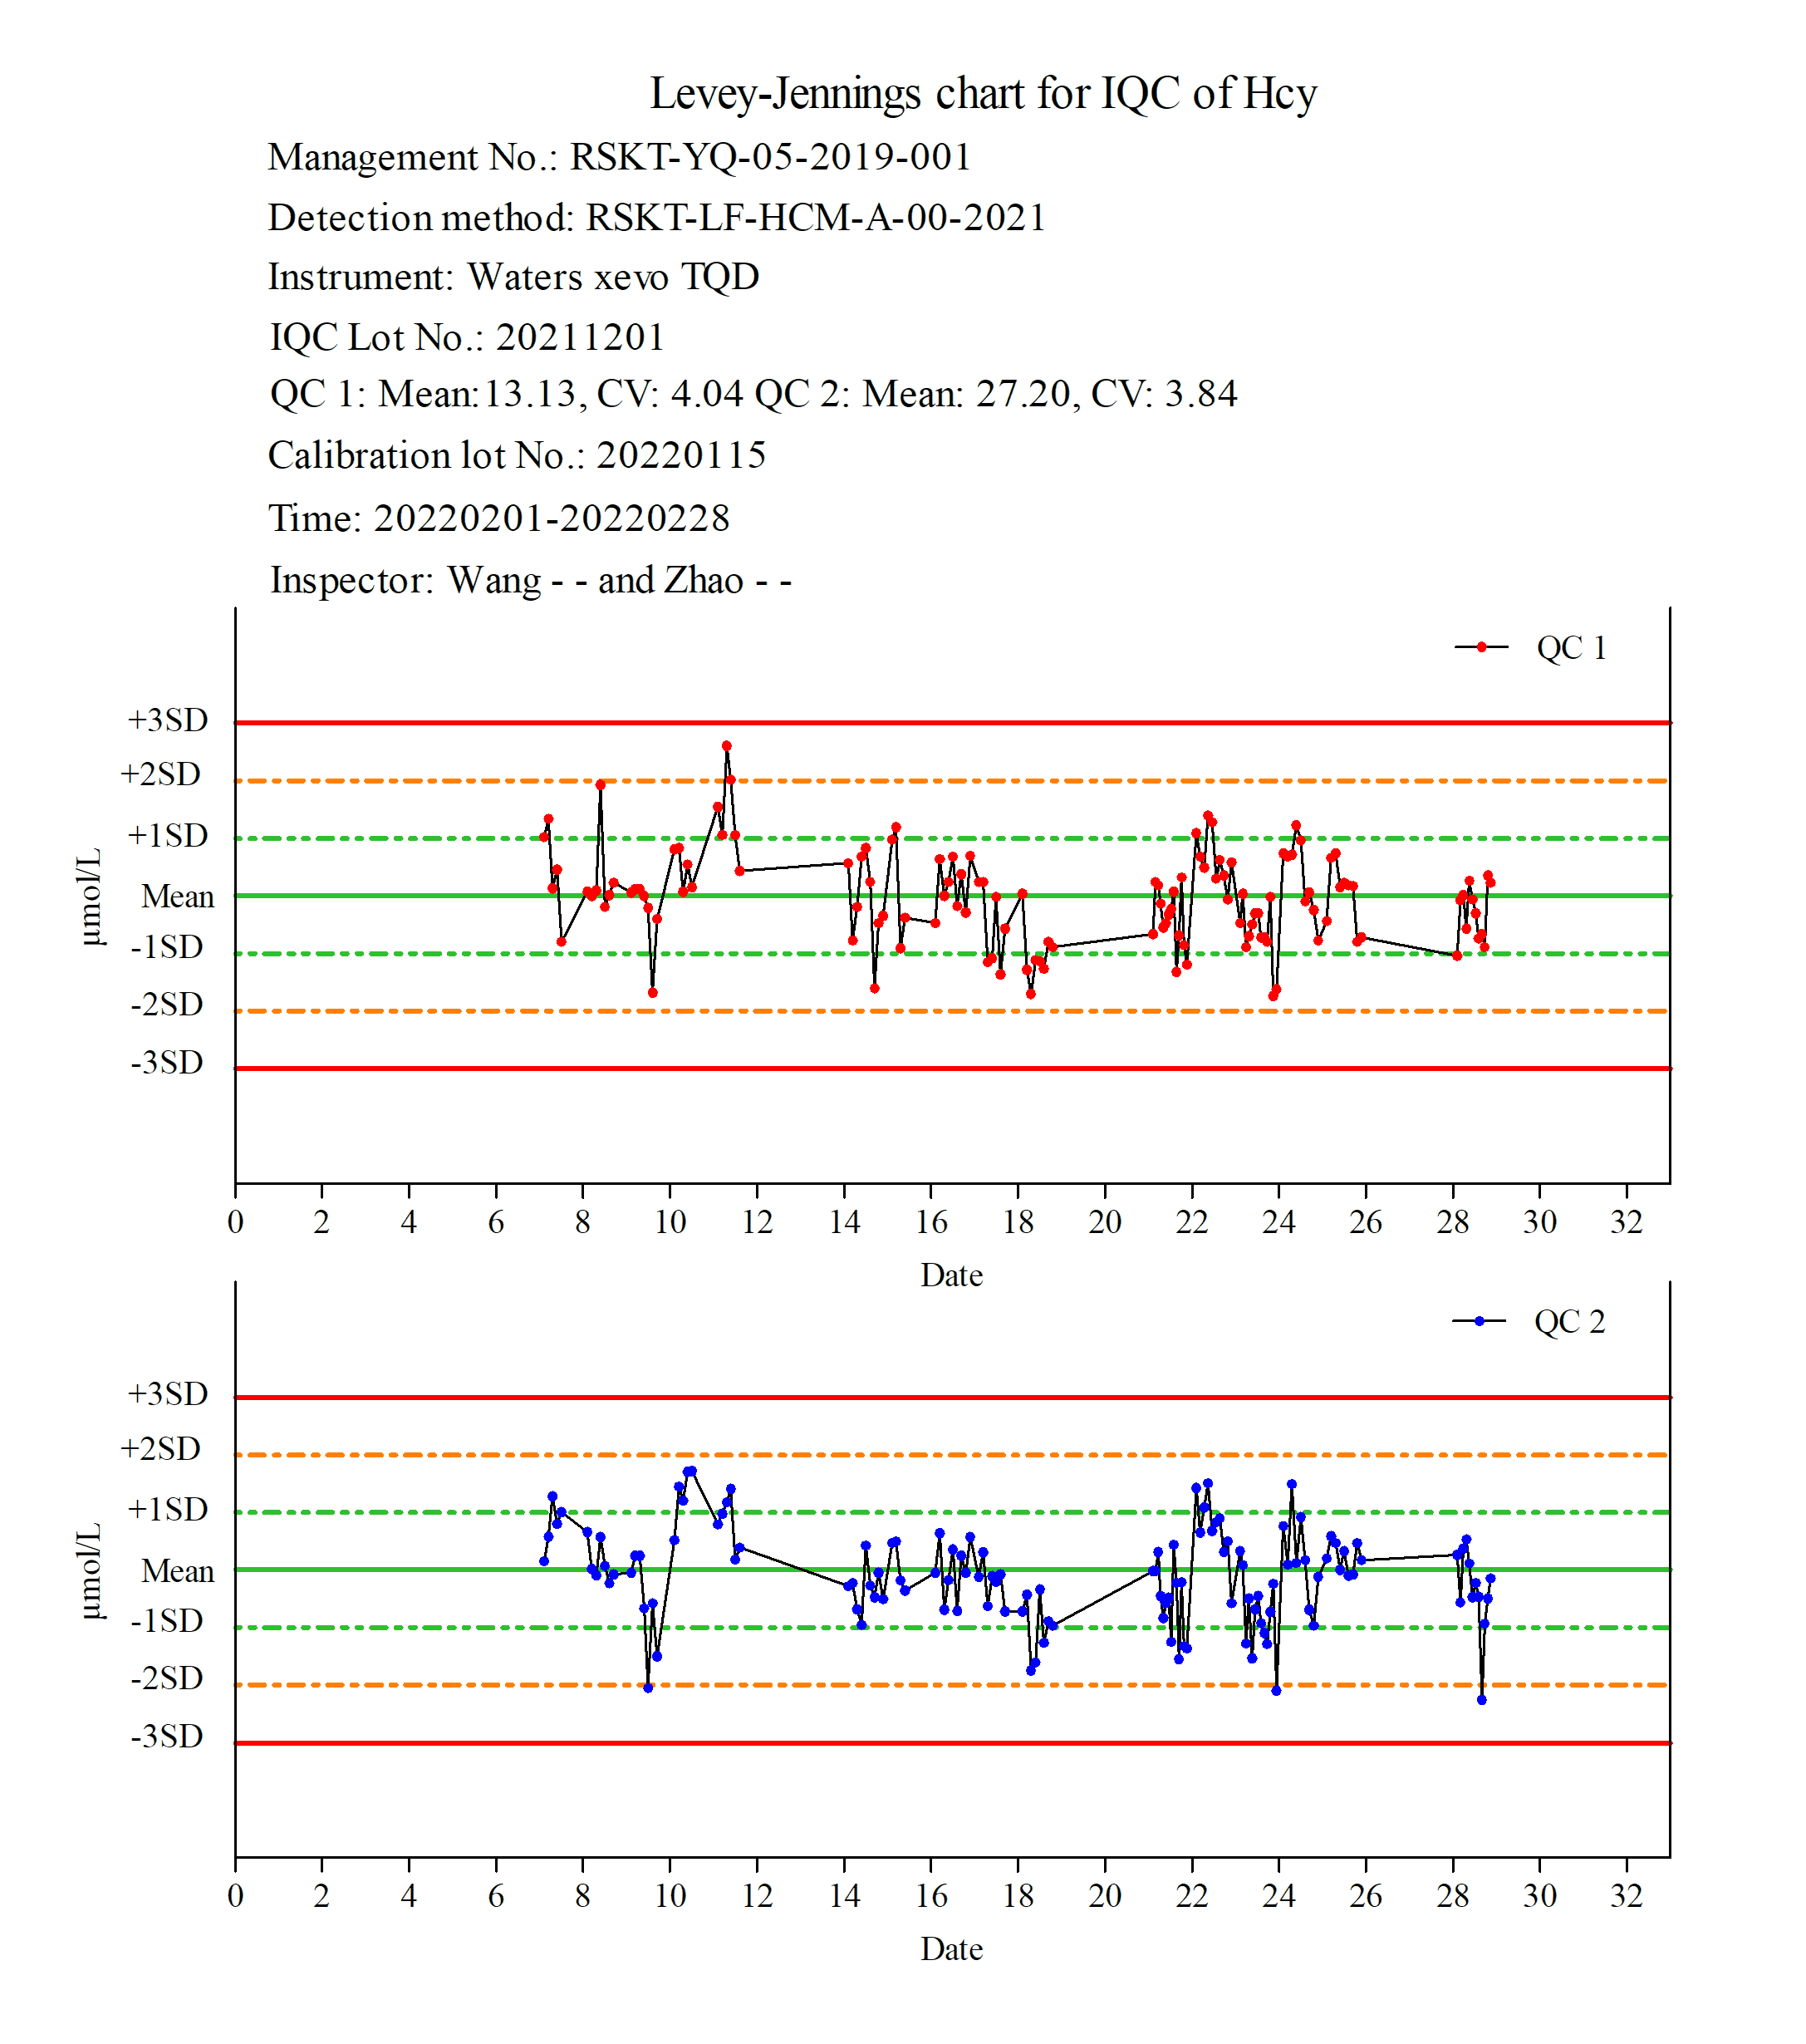
Supplementary Figure 5 Levey-Jennings chart for Feb. IQC of Hcy (Lot no. 20211201)**

**
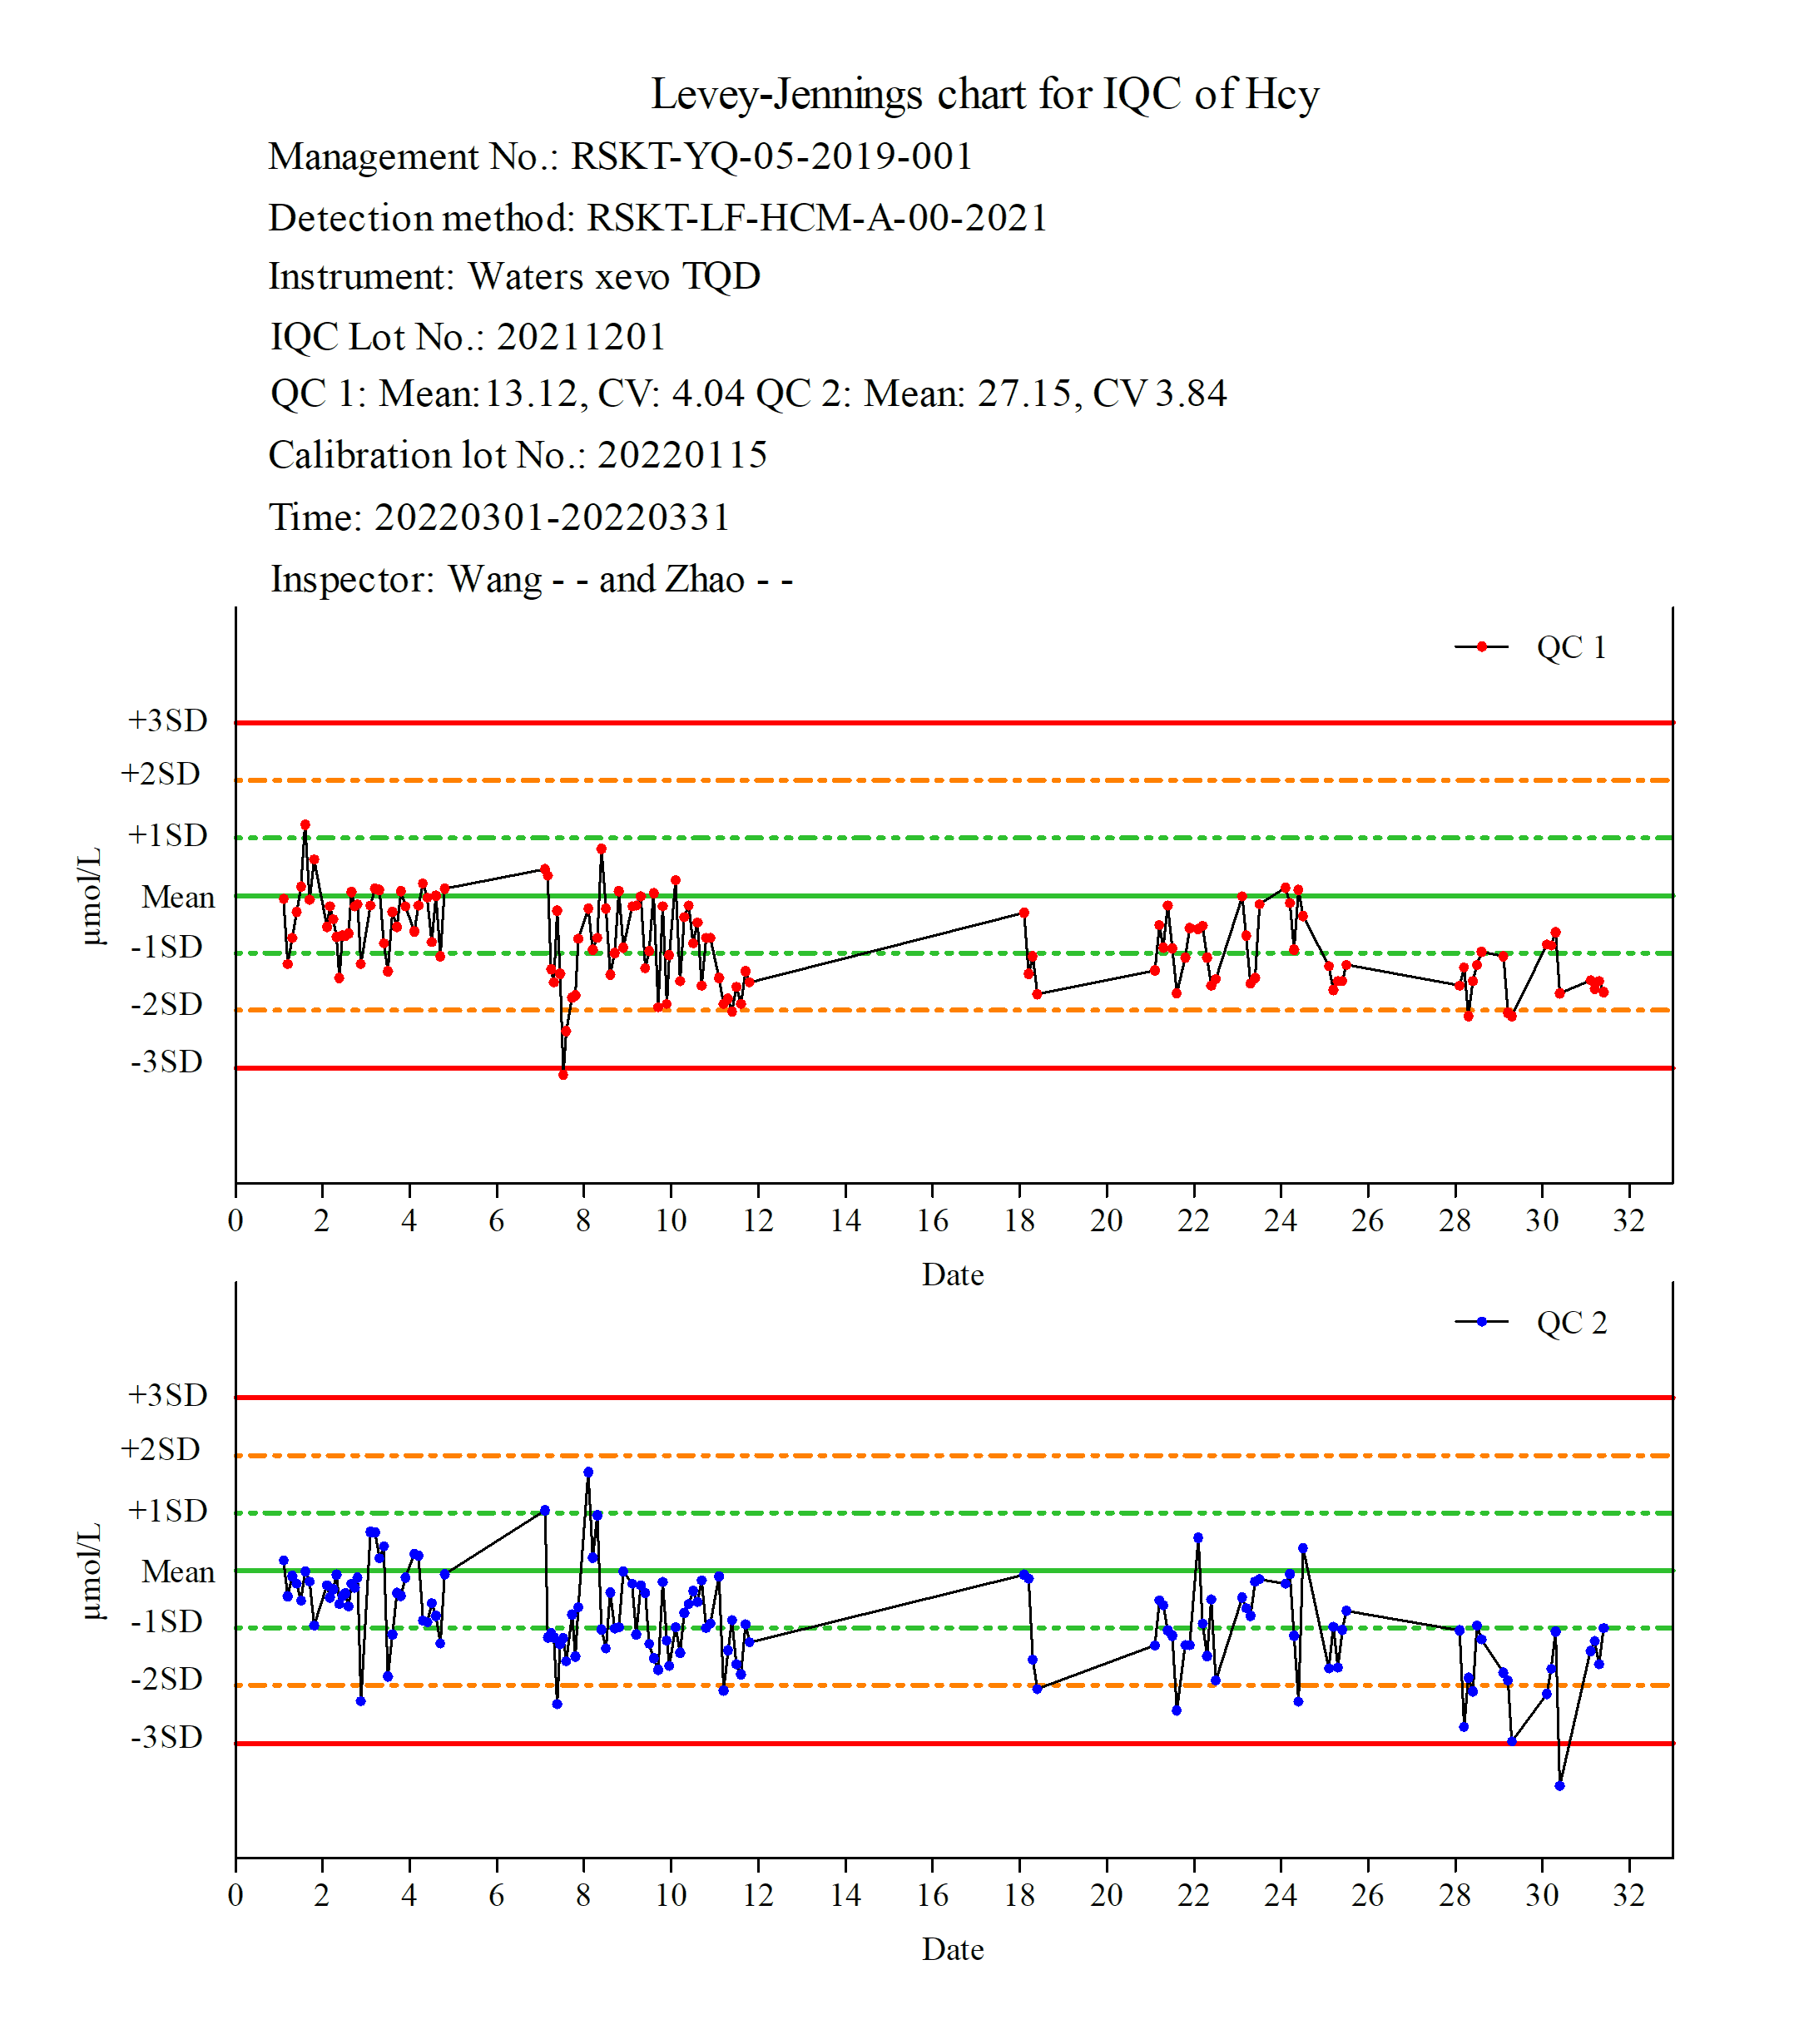
Supplementary** Figure 6 Levey-Jennings chart for Mar. IQC of Hcy (Lot no. 20211201)
